# Supplementary material for: The differential expression of mRNAs and long noncoding RNAs between ectopic and eutopic endometria provides new insights into adenomyosis
Source: Royal Society of Chemistry journal article supplement (doi:10.1039/c5mb00733j), 2015-12-10
Supplement: c5mb00733j2.xlsx [file c5mb00733j2.xlsx]

## Sheet: Sheet1
Table S2 : Fold-changes of differentially expressed lncRNAs in ectopic
endometria compared with eutopic endometria
ProbeName	Database_ID	FC (abs)	P(2,1)	Regulation
RNA162980|XLOC_002931	XLOC_002931	18.1911	0.00302147	up
RNA39726|RefSeq_1728_2011	NR_028292	18.0099	0.0495167	up
RNA39753|RefSeq_1757_1984	NR_028293	17.8157	0.0468331	up
RNA51555|UCSC_11121_474	uc010ngq.1	14.5153	0.0116822	up
RNA51840|UCSC_11438_359	uc010ngn.1	14.2062	0.00247799	up
RNA53290|H-InvDB_556_603	HIT000196511.10	12.8319	5.65627e-05	up
RNA54158|H-InvDB_1458_362	HIT000196055.9	12.7971	0.00523056	up
RNA52958|H-InvDB_216_766	HIT000080345.11	11.9298	0.0223912	up
RNA42669|UCSC_247_6267	uc001kkt.2	11.7669	0.0346155	up
RNA54269|H-InvDB_1572_346	HIT000327513.9	10.7094	0.0277275	up
RNA43225|UCSC_924_4208	uc001gwr.1	10.549	0.00720986	up
RNA54691|H-InvDB_2024_303	HIT000196056.9	10.5205	0.0147839	up
RNA54944|H-InvDB_2302_270	HIT000325527.10	9.88916	0.00654897	up
RNA39649|RefSeq_1646_2073	NR_002773	8.7329	0.037626	up
RNA176651|ENST00000453688	ENST00000453688	8.47088	0.00584009	up
RNA165822|XLOC_008182	XLOC_008182	8.41752	0.00101019	up
RNA53677|H-InvDB_951_451	HIT000220620.10	7.98344	0.00745983	up
RNA52875|H-InvDB_130_912	HIT000221580.10	7.52048	0.0219485	up
RNA54714|H-InvDB_2048_300	HIT000215569.9	7.20402	0.000358412	up
RNA34495|NRED_627_1913	AK024680	7.13167	0.0312303	up
RNA43416|UCSC_1148_3874	uc002vlm.2	7.01213	0.0375269	up
RNA45396|UCSC_3593_2378	uc011mwb.1	6.97544	0.0288938	up
RNA51717|UCSC_11305_412	uc002vgv.1	6.94773	0.0360237	up
RNA46030|UCSC_4390_2136	uc004ezm.2	6.90133	0.0302178	up
RNA39164|RefSeq_1129_2588	NR_027621	6.86278	0.0241045	up
RNA49196|UCSC_8224_1223	uc010wmi.1	6.67846	0.0382433	up
RNA49215|UCSC_8249_1217	uc010qcl.1	6.42273	0.008332	up
RNA53931|H-InvDB_1213_397	HIT000069398.10	6.36806	0.016309	up
RNA59658|RNAz_369_365	RNZ4904	6.29554	0.00887994	up
RNA160136|XLOC_010947	XLOC_010947	6.27185	0.00102453	up
RNA47686|UCSC_6416_1668	uc010bgn.2	6.186	0.00125249	up
RNA51253|UCSC_10738_593	uc003gpt.2	5.97408	0.00692131	up
RNA178649|ENST00000438676	ENST00000438676	5.95714	0.00810358	up
RNA96482|EvoFold_307_242	EvoFold_23414	5.93191	0.000220387	up
RNA175975|ENST00000519898	ENST00000519898	5.72615	0.0180216	up
RNA43344|UCSC_1062_3980	uc003fru.1	5.72485	0.00763847	up
RNA60053|RNAz_765_319	RNZ24618	5.70231	0.0375114	up
RNA176285|ENST00000506665	ENST00000506665	5.61814	0.0286992	up
RNA96328|EvoFold_145_277	EvoFold_38044	5.44446	0.0193817	up
RNA164976|XLOC_006299	XLOC_006299	5.44281	0.0114651	up
RNA46830|UCSC_5364_1908	uc003mhe.1	5.29203	0.0340016	up
RNA33966|NRED_96_3955	AK126481	5.2685	0.0229433	up
RNA159453|XLOC_009852	XLOC_009852	5.26339	0.00195883	up
RNA164027|XLOC_004598	XLOC_004598	5.26036	0.0319872	up
RNA38125|RefSeq_30_9070	NR_027180	5.258	0.037325	up
RNA33872|NRED_2_8488	CR933654	5.23531	0.0308899	up
RNA47992|UCSC_6781_1586	uc001mkf.2	5.22501	0.033926	up
RNA33894|NRED_24_5785	AL137734	5.21826	0.032644	up
RNA176286|ENST00000508521	ENST00000508521	5.13066	0.027398	up
RNA64897|RNAz_5618_200	RNZ24999	5.07379	0.00316749	up
RNA54242|H-InvDB_1545_351	HIT000087476.10	5.05306	0.0336078	up
RNA51396|UCSC_10917_541	uc001pql.1	4.95682	0.000944306	up
RNA96456|EvoFold_281_245	EvoFold_38107	4.95129	0.0278327	up
RNA48686|UCSC_7627_1373	uc001prn.1	4.90784	0.020341	up
RNA39800|RefSeq_1804_1928	NR_027151	4.84075	0.00737032	up
RNA45728|UCSC_4014_2252	uc009xox.1	4.76708	0.0239374	up
RNA38265|RefSeq_173_5682	NR_024179	4.66819	0.00502933	up
RNA38915|RefSeq_860_3013	NR_028131	4.60053	0.0157607	up
RNA38861|RefSeq_803_3124	NR_028130	4.54692	0.0146294	up
RNA38869|RefSeq_811_3102	NR_028132	4.52986	0.0117835	up
RNA40909|RefSeq_3006_800	NR_024337	4.52785	0.0166824	up
RNA43944|UCSC_1783_3347	uc010nrk.2	4.5034	0.0087905	up
RNA40493|RefSeq_2552_1225	NR_033725	4.47137	0.0238101	up
RNA63974|RNAz_4694_215	RNZ25539	4.44505	0.00262823	up
RNA38544|RefSeq_464_3947	NR_033519	4.39999	0.0330458	up
RNA175976|ENST00000522358	ENST00000522358	4.34502	0.0311843	up
RNA164755|XLOC_006091	XLOC_006091	4.29968	0.00582628	up
RNA58140|UCRs_455_202	uc.204+	4.27756	0.034151	up
RNA53575|H-InvDB_847_488	HIT000279457.11	4.24699	0.0015755	up
RNA54156|H-InvDB_1456_362	HIT000389219.4	4.22622	0.0488759	up
RNA43085|UCSC_761_4508	uc003xyh.1	4.22095	0.0247445	up
RNA175985|ENST00000518014	ENST00000518014	4.21297	0.00425735	up
RNA49434|UCSC_8513_1156	uc002ukz.1	4.16904	0.0273705	up
RNA47579|UCSC_6290_1695	uc004fhq.1	4.16423	9.37438e-05	up
RNA44608|UCSC_2596_2810	uc010lmn.2	4.13231	0.00356785	up
RNA42878|UCSC_511_5115	uc003lqr.2	4.1269	0.00640133	up
RNA35380|ENCODE_242_2085	ENST00000366215	4.1146	0.00900114	up
RNA175973|ENST00000523269	ENST00000523269	4.09266	0.0275699	up
RNA175978|ENST00000524265	ENST00000524265	4.00772	0.00269746	up
RNA162124|XLOC_013717	XLOC_013717	4.00218	0.0148615	up
RNA44119|UCSC_1996_3186	uc010kim.2	3.93643	0.0146125	up
RNA175700|ENST00000536551	ENST00000536551	3.93514	0.00125012	up
RNA58721|asoverlaps_276_2192	ASO3794	3.92571	0.00600808	up
RNA51990|UCSC_11606_298	uc002nyb.1	3.90658	0.0358063	up
RNA54978|H-InvDB_2339_267	HIT000248567.9	3.85314	0.0261196	up
RNA63531|RNAz_4250_225	RNZ24743	3.83035	0.032092	up
RNA64275|RNAz_4996_204	RNZ17545	3.81145	0.0154117	up
RNA175979|ENST00000509909	ENST00000509909	3.78087	0.0293947	up
RNA175972|ENST00000512096	ENST00000512096	3.73618	0.0284962	up
RNA42479|UCSC_10_12617	uc009xuz.2	3.71196	0.0181671	up
RNA43604|UCSC_1374_3641	uc002zgu.2	3.70843	0.0315376	up
RNA51885|UCSC_11486_346	uc002uov.1	3.69623	0.0259128	up
RNA176284|ENST00000514158	ENST00000514158	3.69065	0.0323226	up
RNA43633|UCSC_1408_3614	uc004ahn.2	3.67552	0.0285317	up
RNA54389|H-InvDB_1702_334	HIT000251644.11	3.66466	0.0427006	up
RNA43057|UCSC_729_4575	uc001jvt.1	3.66019	0.0413537	up
RNA175974|ENST00000505254	ENST00000505254	3.64413	0.0381293	up
RNA47981|UCSC_6768_1588	uc001hlp.2	3.62005	0.0105238	up
RNA50052|UCSC_9250_994	uc011djj.1	3.60331	0.0341935	up
RNA42967|UCSC_618_4819	uc003ubq.3	3.57717	0.0293485	up
RNA40671|RefSeq_2746_1057	NR_033796	3.57408	0.00591551	up
RNA38340|RefSeq_254_4938	NR_027674	3.50562	0.033388	up
RNA42966|UCSC_617_4820	uc010lcl.2	3.48788	0.035866	up
RNA39267|RefSeq_1235_2468	NR_002174	3.46177	0.0128817	up
RNA43143|UCSC_828_4375	uc001pjf.3	3.46133	0.0396066	up
RNA34736|NRED_868_1545	AK000864	3.45347	0.0447615	up
RNA34481|NRED_613_1934	AK022222	3.43759	0.0348071	up
RNA164991|XLOC_006309	XLOC_006309	3.43426	0.00155269	up
RNA162914|XLOC_002876	XLOC_002876	3.40331	0.00025074	up
RNA38526|RefSeq_445_4003	NR_027672	3.40252	0.0489458	up
RNA43943|UCSC_1782_3348	uc003tdf.1	3.39928	0.0459363	up
RNA52986|H-InvDB_244_718	HIT000287936.11	3.37281	0.0492704	up
RNA161628|XLOC_001595	XLOC_001595	3.35092	0.0286788	up
RNA59591|RNAz_302_386	RNZ35755	3.3341	0.00220064	up
RNA42895|UCSC_529_5058	uc002zgq.2	3.33118	0.0440463	up
RNA175046|ENST00000502083	ENST00000502083	3.32245	0.0210732	up
RNA52973|H-InvDB_231_738	HIT000284194.11	3.30283	0.0490318	up
RNA46360|UCSC_4797_2039	uc003ndh.2	3.27496	0.0458999	up
RNA44738|UCSC_2766_2725	uc003tzr.2	3.25889	0.0208419	up
RNA43191|UCSC_883_4271	uc009vtn.1	3.23858	0.0206595	up
RNA43101|UCSC_781_4481	uc001ecg.2	3.2383	0.00577739	up
RNA43526|UCSC_1278_3735	uc010ngs.2	3.23018	0.0323014	up
RNA43110|UCSC_791_4452	uc009ykh.2	3.22497	0.0303256	up
RNA48396|UCSC_7272_1467	uc010rce.1	3.22313	0.042071	up
RNA43239|UCSC_942_4178	uc011bfw.1	3.20545	0.0181167	up
RNA53075|H-InvDB_334_660	HIT000254628.10	3.2049	0.0141736	up
RNA42882|UCSC_516_5098	uc001rhs.2	3.20286	0.0158971	up
RNA46474|UCSC_4950_2004	uc003yud.2	3.19813	0.0134498	up
RNA44242|UCSC_2149_3084	uc010rpi.1	3.19685	0.0267991	up
RNA47674|UCSC_6403_1669	uc011alh.1	3.18828	0.00439871	up
RNA39026|RefSeq_978_2838	NR_027152	3.17281	0.00520982	up
RNA43854|UCSC_1673_3414	uc009wgh.2	3.16579	0.00638422	up
RNA63763|RNAz_4483_219	RNZ11456	3.16348	0.0245628	up
RNA177774|ENST00000535337	ENST00000535337	3.15828	0.00538379	up
RNA54195|H-InvDB_1497_357	HIT000394904.4	3.15686	0.0340087	up
RNA176276|ENST00000514794	ENST00000514794	3.14552	0.00853213	up
RNA52115|UCSC_11744_213	uc001pqs.1	3.13605	0.0347856	up
RNA177771|ENST00000538790	ENST00000538790	3.12522	0.00273022	up
RNA60808|RNAz_1522_279	RNZ6488	3.11538	0.0287458	up
RNA177772|ENST00000540968	ENST00000540968	3.10709	0.00102106	up
RNA49653|UCSC_8776_1097	uc009zqn.2	3.09066	0.0447738	up
RNA34493|NRED_625_1914	AK021986	3.09006	0.00973154	up
RNA45777|UCSC_4080_2230	uc010kad.2	3.08791	7.53093e-05	up
RNA44640|UCSC_2642_2788	uc003owk.2	3.04232	0.0204654	up
RNA60837|RNAz_1551_279	RNZ14566	3.0345	0.00719034	up
RNA42758|UCSC_362_5654	uc009wvb.2	3.02809	0.0414835	up
RNA177539|ENST00000549723	ENST00000549723	3.00976	0.0213302	up
RNA37473|ENCODE_2344_412	ENST00000451698	2.9945	0.0426099	up
RNA58746|asoverlaps_307_2106	ASO1823	2.98618	0.00114588	up
RNA38744|RefSeq_680_3393	NR_033439	2.98247	0.0167526	up
RNA161221|XLOC_013120	XLOC_013120	2.97033	0.00507218	up
RNA35420|ENCODE_284_1947	ENST00000430111	2.94491	0.0266339	up
RNA57756|UCRs_71_312	uc.33+	2.93229	0.0425218	up
RNA52935|H-InvDB_193_797	HIT000089980.10	2.93063	0.0284479	up
RNA38727|RefSeq_663_3431	NR_033438	2.92242	0.0250843	up
RNA49135|UCSC_8151_1242	uc003dnm.1	2.90902	0.0170252	up
RNA55347|H-InvDB_2723_222	HIT000325797.7	2.90213	0.0271202	up
RNA62580|RNAz_3298_238	RNZ10079	2.89905	0.0270949	up
RNA55227|H-InvDB_2598_237	HIT000558446.2	2.88197	0.0294129	up
RNA39083|RefSeq_1043_2716	NR_026900	2.86254	0.0251605	up
RNA55054|H-InvDB_2418_259	HIT000249432.10	2.85958	0.00551226	up
RNA44112|UCSC_1989_3193	uc003vig.1	2.85622	0.00916417	up
RNA51804|UCSC_11397_374	uc002fuc.1	2.85547	0.0182518	up
RNA55583|H-InvDB_2965_213	HIT000195240.10	2.85402	0.0263688	up
RNA163061|XLOC_003403	XLOC_003403	2.85399	0.043972	up
RNA63473|RNAz_4192_226	RNZ31182	2.84359	0.00918469	up
RNA96260|EvoFold_71_299	EvoFold_21530	2.83322	0.0258985	up
RNA42975|UCSC_628_4795	uc009wvh.2	2.81487	0.0451195	up
RNA61122|RNAz_1836_275	RNZ9106	2.80801	0.0431003	up
RNA163843|XLOC_004430	XLOC_004430	2.80688	0.00310337	up
RNA160297|XLOC_011309	XLOC_011309	2.802	0.00937019	up
RNA50654|UCSC_9994_809	uc010gbh.2	2.7992	0.00120118	up
RNA63301|RNAz_4019_229	RNZ10971	2.78265	0.032824	up
RNA38511|RefSeq_430_4051	NR_024537	2.77565	0.0253527	up
RNA58681|asoverlaps_227_2386	ASO1786	2.77267	0.00176092	up
RNA47317|UCSC_5947_1774	uc004dwe.2	2.76611	0.0124465	up
RNA176604|ENST00000508786	ENST00000508786	2.75542	0.0147409	up
RNA39763|RefSeq_1767_1972	NR_002836	2.75417	0.0371272	up
RNA61599|RNAz_2313_261	RNZ11484	2.74256	0.0268764	up
RNA163523|XLOC_004190	XLOC_004190	2.73465	0.0385526	up
RNA36688|ENCODE_1558_552	ENST00000430428	2.72097	0.0389648	up
RNA57920|UCRs_235_244	uc.409+	2.67979	0.0111523	up
RNA34950|NRED_1090_1053	AL049449	2.67323	0.000133009	up
RNA42862|UCSC_490_5200	uc002wlc.2	2.66609	0.0127415	up
RNA42542|UCSC_97_7900	uc003ipa.2	2.66368	0.00724082	up
RNA38712|RefSeq_645_3475	NR_027790	2.65588	0.04825	up
RNA42712|UCSC_301_5928	uc004byv.1	2.65216	0.0144612	up
RNA64685|RNAz_5406_200	RNZ7093	2.65032	0.0382529	up
RNA42799|UCSC_409_5471	uc002wle.2	2.63005	0.0103437	up
RNA53533|H-InvDB_803_502	HIT000242193.11	2.6254	0.0153215	up
RNA43954|UCSC_1797_3337	uc002vxg.2	2.62537	0.0331064	up
RNA39188|RefSeq_1153_2562	NR_024165	2.62145	0.00382954	up
RNA158405|XLOC_001225	XLOC_001225	2.61833	0.0143318	up
RNA176278|ENST00000513704	ENST00000513704	2.61704	0.0199743	up
RNA38872|RefSeq_814_3099	NR_027450	2.61603	0.018326	up
RNA51809|UCSC_11402_373	uc009zdx.1	2.59471	0.0205649	up
RNA60205|RNAz_917_314	RNZ34933	2.58853	0.0370359	up
RNA177719|ENST00000438095	ENST00000438095	2.5811	0.0202103	up
RNA175851|ENST00000320322	ENST00000320322	2.57782	0.0249472	up
RNA44346|UCSC_2287_2979	uc010sxl.1	2.57761	0.0277235	up
RNA36945|ENCODE_1815_499	ENST00000427132	2.57668	0.0265427	up
RNA44534|UCSC_2514_2852	uc009xbd.1	2.55898	0.0111629	up
RNA44568|UCSC_2549_2835	uc001bjn.2	2.55297	0.0335063	up
RNA162604|XLOC_002565	XLOC_002565	2.53984	0.0494836	up
RNA36700|ENCODE_1570_550	ENST00000413645	2.53968	0.0403808	up
RNA48364|UCSC_7234_1475	uc010dld.2	2.53883	0.0391526	up
RNA43308|UCSC_1018_4052	uc001avl.1	2.53841	0.0262243	up
RNA177377|ENST00000475886	ENST00000475886	2.53593	0.0365201	up
RNA176282|ENST00000511876	ENST00000511876	2.53456	0.00221276	up
RNA41241|RefSeq_3374_344	NR_001524	2.53411	0.0415444	up
RNA164103|XLOC_005104	XLOC_005104	2.53109	0.049333	up
RNA49032|UCSC_8035_1272	uc010nqf.2	2.52423	0.0468636	up
RNA57911|UCRs_226_247	uc.40+	2.51861	0.0319884	up
RNA49793|UCSC_8945_1062	uc010hyo.1	2.51815	0.0328928	up
RNA34595|NRED_727_1750	BC064139	2.51675	0.0182709	up
RNA38898|RefSeq_841_3040	NR_026988	2.51303	0.0345929	up
RNA39176|RefSeq_1141_2573	NR_024164	2.50906	9.79302e-05	up
RNA36774|ENCODE_1644_536	ENST00000413339	2.48871	0.000569465	up
RNA64389|RNAz_5110_200	RNZ31468	2.48432	0.035802	up
RNA48687|UCSC_7628_1373	uc003jot.1	2.482	0.00555844	up
RNA36927|ENCODE_1797_503	ENST00000438762	2.47899	0.0192234	up
RNA52901|H-InvDB_157_850	HIT000260556.11	2.47795	0.0248093	up
RNA47600|UCSC_6314_1689	uc002ylq.1	2.47194	0.00718109	up
RNA162815|XLOC_002759	XLOC_002759	2.46888	0.0320443	up
RNA42867|UCSC_495_5161	uc003jov.2	2.46805	0.0251082	up
RNA46511|UCSC_4992_1992	uc011mtl.1	2.46085	0.0111471	up
RNA51195|UCSC_10665_614	uc001phs.2	2.45564	0.047667	up
RNA52991|H-InvDB_249_712	HIT000087603.11	2.45266	0.0391938	up
RNA177526|ENST00000476964	ENST00000476964	2.44837	0.02825	up
RNA165730|XLOC_008100	XLOC_008100	2.44455	0.00873068	up
RNA42808|UCSC_419_5431	uc001syy.2	2.44068	0.0119838	up
RNA61784|RNAz_2498_252	RNZ14806	2.4373	0.0261401	up
RNA58577|asoverlaps_92_3152	ASO3936	2.42384	0.0304128	up
RNA44811|UCSC_2857_2682	uc001abs.2	2.42181	0.0208537	up
RNA64113|RNAz_4833_210	RNZ33035	2.41397	0.00593486	up
RNA54008|H-InvDB_1290_387	HIT000195782.7	2.40995	0.0317811	up
RNA53659|H-InvDB_933_456	HIT000322817.9	2.40796	0.015952	up
RNA60342|RNAz_1054_306	RNZ30962	2.4069	0.0475321	up
RNA54370|H-InvDB_1680_337	HIT000246888.11	2.40458	0.0499115	up
RNA36838|ENCODE_1708_522	ENST00000444862	2.40284	0.0420368	up
RNA58795|asoverlaps_377_1970	ASO3484	2.40279	0.0245852	up
RNA159675|XLOC_010574	XLOC_010574	2.39931	0.00767351	up
RNA42812|UCSC_424_5413	uc001tod.2	2.39482	0.0190076	up
RNA177518|ENST00000469278	ENST00000469278	2.38563	0.0424564	up
RNA64114|RNAz_4834_210	RNZ35739	2.37643	0.0359605	up
RNA162301|XLOC_013869	XLOC_013869	2.37552	0.0493333	up
RNA44254|UCSC_2168_3068	uc003ehe.2	2.3681	0.0327081	up
RNA34785|NRED_918_1438	AK025893	2.35966	0.0412946	up
RNA58747|asoverlaps_308_2100	ASO3515	2.35272	0.0440508	up
RNA39914|RefSeq_1935_1795	NR_027626	2.35098	0.0480932	up
RNA177537|ENST00000547845	ENST00000547845	2.34168	0.00165706	up
RNA55178|H-InvDB_2549_243	HIT000325986.8	2.33338	0.00476484	up
RNA45445|UCSC_3652_2361	uc011mqs.1	2.33077	0.00421095	up
RNA62314|RNAz_3032_239	RNZ32336	2.32591	0.0442423	up
RNA43049|UCSC_719_4594	uc003zyx.2	2.32559	0.041767	up
RNA45864|UCSC_4191_2198	uc010nml.2	2.32282	0.00698297	up
RNA58926|asoverlaps_543_1617	ASO3663	2.32209	0.0455257	up
RNA53764|H-InvDB_1042_428	HIT000242307.10	2.3198	0.0453187	up
RNA172615|ENST00000517197	ENST00000517197	2.31661	0.0352323	up
RNA61020|RNAz_1734_276	RNZ35970	2.31511	0.00714981	up
RNA159820|XLOC_010679	XLOC_010679	2.31483	0.0145073	up
RNA49077|UCSC_8088_1258	uc010srk.1	2.31204	0.0469417	up
RNA53382|H-InvDB_651_555	HIT000321909.11	2.3112	0.0282143	up
RNA38764|RefSeq_702_3344	NR_026985	2.30731	0.0190263	up
RNA162688|XLOC_003111	XLOC_003111	2.30454	0.0206359	up
RNA51685|UCSC_11270_426	uc010hdz.1	2.30185	0.0280529	up
RNA177538|ENST00000551626	ENST00000551626	2.29806	0.000982042	up
RNA162960|XLOC_002908	XLOC_002908	2.29775	0.015267	up
RNA159208|XLOC_009335	XLOC_009335	2.28946	0.0228966	up
RNA163586|XLOC_004691	XLOC_004691	2.28468	0.0405511	up
RNA62446|RNAz_3164_238	RNZ34748	2.28264	0.0394242	up
RNA159983|XLOC_011016	XLOC_011016	2.28039	0.0454622	up
RNA59038|asoverlaps_687_1246	ASO3687	2.2801	0.0468289	up
RNA48024|UCSC_6819_1578	uc002tda.2	2.27802	0.000701344	up
RNA175021|ENST00000454594	ENST00000454594	2.27642	0.00274553	up
RNA47907|UCSC_6680_1607	uc001bdg.2	2.27486	0.0053074	up
RNA49106|UCSC_8122_1250	uc004cqn.2	2.27384	0.0452263	up
RNA47666|UCSC_6392_1671	uc010fuc.1	2.26675	0.00482286	up
RNA177527|ENST00000491282	ENST00000491282	2.25805	0.038353	up
RNA55085|H-InvDB_2451_255	HIT000249429.10	2.25096	0.00416428	up
RNA34118|NRED_249_2797	AK123567	2.24869	0.0374099	up
RNA162168|XLOC_013547	XLOC_013547	2.245	0.00535934	up
RNA34440|NRED_572_2010	AK022117	2.24088	0.00908305	up
RNA46988|UCSC_5550_1863	uc002ufj.3	2.23774	0.0106173	up
RNA39319|RefSeq_1291_2410	NR_028136	2.23666	0.0479281	up
RNA54194|H-InvDB_1496_357	HIT000326074.9	2.23606	0.0412435	up
RNA177317|ENST00000473550	ENST00000473550	2.23261	0.0200706	up
RNA60364|RNAz_1076_305	RNZ27146	2.22796	0.0467664	up
RNA44734|UCSC_2761_2729	uc010ats.2	2.22737	0.0481859	up
RNA158691|XLOC_008488	XLOC_008488	2.2261	0.014484	up
RNA45895|UCSC_4228_2185	uc003wzh.2	2.21827	0.040965	up
RNA43277|UCSC_983_4107	uc002rmw.2	2.2169	0.0151188	up
RNA45193|UCSC_3329_2475	uc001klk.2	2.21338	0.0088903	up
RNA45638|UCSC_3902_2285	uc003xif.1	2.2113	0.00984467	up
RNA38852|RefSeq_794_3144	NR_026986	2.20908	0.0200436	up
RNA51639|UCSC_11217_441	uc001pwg.1	2.20154	0.030193	up
RNA40402|RefSeq_2455_1344	NR_003189	2.19788	0.0400244	up
RNA53296|H-InvDB_562_599	HIT000067356.9	2.19709	0.0311408	up
RNA62688|RNAz_3406_237	RNZ31467	2.1951	0.00486081	up
RNA40863|RefSeq_2954_852	NR_003698	2.19467	0.0297621	up
RNA47536|UCSC_6228_1711	uc001eng.1	2.19206	0.0415845	up
RNA42913|UCSC_554_4998	uc009yvj.2	2.1888	0.0265456	up
RNA44118|UCSC_1995_3186	uc003uyy.2	2.18646	0.0392834	up
RNA64037|RNAz_4757_212	RNZ12894	2.18603	0.00973577	up
RNA61338|RNAz_2052_269	RNZ6545	2.18121	0.0404404	up
RNA53807|H-InvDB_1086_420	HIT000024195.16	2.17681	0.0130227	up
RNA36996|ENCODE_1866_490	ENST00000440246	2.17361	0.0486572	up
RNA34545|NRED_677_1830	AK055109	2.1704	0.0162003	up
RNA45044|UCSC_3144_2545	uc004afc.2	2.16806	0.00391164	up
RNA45971|UCSC_4310_2159	uc002bqs.1	2.1657	0.00234377	up
RNA54881|H-InvDB_2231_282	HIT000255511.9	2.16271	0.043403	up
RNA36322|ENCODE_1192_645	ENST00000452503	2.16052	0.0331391	up
RNA48939|UCSC_7934_1293	uc010aoc.1	2.15374	0.0491046	up
RNA159916|XLOC_010967	XLOC_010967	2.15311	0.0134049	up
RNA54146|H-InvDB_1445_364	HIT000394850.5	2.15224	0.0395792	up
RNA178574|ENST00000389594	ENST00000389594	2.15121	0.0169961	up
RNA96740|EvoFold_592_200	EvoFold_23929	2.144	0.0128337	up
RNA176600|ENST00000502432	ENST00000502432	2.13542	0.000607317	up
RNA48303|UCSC_7163_1495	uc003ndl.2	2.13418	0.028156	up
RNA164099|XLOC_004671	XLOC_004671	2.13185	0.0194845	up
RNA34861|NRED_995_1274	BC019085	2.1285	0.0146798	up
RNA39047|RefSeq_999_2798	NR_036467	2.12734	0.0466829	up
RNA174930|ENST00000508732	ENST00000508732	2.12262	0.0475806	up
RNA55129|H-InvDB_2499_250	HIT000323538.10	2.12251	0.0366339	up
RNA143568|rRNA_7_1559	FR328519	2.12198	5.32547e-05	up
RNA178611|ENST00000428865	ENST00000428865	2.11759	0.0226663	up
RNA34216|NRED_347_2510	BC043003	2.11631	0.003747	up
RNA34658|NRED_790_1667	AL080111	2.11416	0.00325645	up
RNA50368|UCSC_9643_904	uc010ikh.1	2.11402	0.00371842	up
RNA58095|UCRs_410_208	uc.34+	2.10936	0.0158609	up
RNA176859|ENST00000416193	ENST00000416193	2.1068	0.00907065	up
RNA64891|RNAz_5612_200	RNZ20362	2.10516	0.0162383	up
RNA48894|UCSC_7882_1307	uc001szk.1	2.1046	0.0416628	up
RNA34492|NRED_624_1917	AK023947	2.10276	0.0356736	up
RNA42889|UCSC_523_5071	uc009xrw.2	2.10195	0.0180703	up
RNA143569|rRNA_8_1558	FR308205	2.0968	0.0182115	up
RNA60003|RNAz_715_320	RNZ29303	2.09008	0.0366132	up
RNA45455|UCSC_3663_2357	uc009vof.2	2.08906	0.0169383	up
RNA177439|ENST00000496640	ENST00000496640	2.08888	0.0152825	up
RNA46612|UCSC_5116_1963	uc009wiu.1	2.08848	0.0352932	up
RNA48051|UCSC_6851_1570	uc003qgs.1	2.08519	0.0444594	up
RNA161603|XLOC_001574	XLOC_001574	2.08373	0.0142346	up
RNA42752|UCSC_350_5674	uc009zul.2	2.08186	0.0198405	up
RNA39139|RefSeq_1101_2632	NR_024122	2.08101	0.033024	up
RNA46088|UCSC_4461_2119	uc002ksq.1	2.07982	0.0349561	up
RNA41178|RefSeq_3299_510	NR_033754	2.07723	0.0320651	up
RNA36348|ENCODE_1218_634	ENST00000455414	2.07715	0.0456675	up
RNA42961|UCSC_611_4838	uc003lxf.1	2.07288	0.0339449	up
RNA38674|RefSeq_605_3588	NR_003521	2.07018	0.000543384	up
RNA175427|ENST00000510523	ENST00000510523	2.06886	0.00409837	up
RNA50139|UCSC_9356_972	uc009ypz.2	2.06863	0.00240724	up
RNA53459|H-InvDB_728_532	HIT000282466.8	2.06818	0.00105894	up
RNA58425|CombinedLit_429_307	LIT3520	2.06561	0.00743975	up
RNA43873|UCSC_1699_3400	uc003spa.1	2.06267	0.0202337	up
RNA59531|RNAz_242_398	RNZ24675	2.06158	0.00539644	up
RNA48606|UCSC_7524_1402	uc002yjl.2	2.06014	0.03272	up
RNA163163|XLOC_003916	XLOC_003916	2.05966	0.00441242	up
RNA34033|NRED_164_3279	AK055652	2.05602	0.00973993	up
RNA40444|RefSeq_2499_1297	NR_003500	2.05511	0.0244892	up
RNA53067|H-InvDB_326_664	HIT000256149.6	2.04985	0.0469684	up
RNA160528|XLOC_011747	XLOC_011747	2.04908	0.012965	up
RNA160877|XLOC_012351	XLOC_012351	2.04228	0.0295669	up
RNA165648|XLOC_007848	XLOC_007848	2.04014	0.0343029	up
RNA53436|H-InvDB_705_541	HIT000066056.11	2.03804	0.0166239	up
RNA61073|RNAz_1787_275	RNZ24434	2.03661	0.0301156	up
RNA38715|RefSeq_648_3470	NR_033956	2.0306	0.03563	up
RNA160865|XLOC_012338	XLOC_012338	2.02982	0.0375371	up
RNA55718|H-InvDB_3106_200	HIT000248847.8	2.02894	0.0481056	up
RNA58022|UCRs_337_220	uc.280+	2.02495	0.0395065	up
RNA63421|RNAz_4139_227	RNZ13423	2.02318	0.0423944	up
RNA49030|UCSC_8033_1273	uc009xln.1	2.02301	0.033218	up
RNA164502|XLOC_005866	XLOC_005866	2.02113	0.022507	up
RNA50427|UCSC_9715_885	uc003vhx.2	2.01981	0.0156353	up
RNA55305|H-InvDB_2679_227	HIT000093258.9	2.01783	0.00335332	up
RNA48603|UCSC_7521_1403	uc003tdd.2	2.01671	0.0169139	up
RNA171959|ENST00000411107	ENST00000411107	2.01594	0.0366768	up
RNA51219|UCSC_10693_605	uc010lkb.1	2.014	0.0147369	up
RNA36973|ENCODE_1843_493	ENST00000423877	2.01245	0.030541	up
RNA42503|UCSC_52_8890	uc002bge.3	2.01153	0.0422263	up
RNA158380|XLOC_000566	XLOC_000566	2.01153	0.0417235	up
RNA47446|UCSC_6111_1736	uc002yps.1	2.00916	0.0119296	up
RNA162937|XLOC_002892	XLOC_002892	2.00752	0.0452449	up
RNA165814|XLOC_008001	XLOC_008001	2.0068	0.0367023	up
RNA37288|ENCODE_2159_441	ENST00000440492	2.00538	0.0423943	up
RNA96364|EvoFold_183_267	EvoFold_23879	2.00231	0.00199785	up
RNA55581|H-InvDB_2963_213	HIT000393127.5	2.00175	0.0428009	up
RNA46704|UCSC_5223_1943	uc010xkz.1	2.00125	0.0310052	up
RNA63587|RNAz_4307_223	RNZ21320	2.00085	0.00059906	up
RNA54694|H-InvDB_2027_303	HIT000248381.10	12.8211	0.0257211	down
RNA51266|UCSC_10753_589	uc001dws.1	12.1086	0.00901357	down
RNA51590|UCSC_11159_462	uc009wez.1	8.85912	0.014042	down
RNA33834|lncRNAdb_41_1441	NONE	8.07553	0.0450116	down
RNA163873|XLOC_004915	XLOC_004915	7.91516	0.0365056	down
RNA178196|ENST00000522112	ENST00000522112	7.40874	0.0429512	down
RNA178197|ENST00000534619	ENST00000534619	7.24009	0.0460955	down
RNA42764|UCSC_371_5598	uc001czp.2	6.71848	0.0341104	down
RNA50078|UCSC_9284_987	uc010fka.1	6.58234	0.00490299	down
RNA49057|UCSC_8064_1263	uc010apr.1	6.32424	0.0368525	down
RNA160934|XLOC_012784	XLOC_012784	5.83474	0.0318971	down
RNA51221|UCSC_10696_604	uc009vzn.1	5.82375	0.00914625	down
RNA36499|ENCODE_1369_589	ENST00000439046	5.68081	0.0189866	down
RNA51746|UCSC_11337_399	uc002ejv.1	5.62994	0.0147612	down
RNA38815|RefSeq_756_3217	NR_027145	5.37313	0.00140463	down
RNA38814|RefSeq_755_3217	NR_027145	5.33044	0.000812092	down
RNA44105|UCSC_1980_3198	uc002tfg.3	5.2921	0.000995117	down
RNA49650|UCSC_8773_1098	uc010fjs.2	5.25869	0.000333683	down
RNA40841|RefSeq_2929_882	NR_037626	5.2525	4.01859e-05	down
RNA40751|RefSeq_2831_977	NR_026775	5.24335	0.0198485	down
RNA43638|UCSC_1415_3611	uc010mfk.1	5.22529	0.0319678	down
RNA40930|RefSeq_3028_774	NR_027142	5.22341	0.00177783	down
RNA40859|RefSeq_2949_856	NR_027143	5.19769	0.00366228	down
RNA40858|RefSeq_2948_856	NR_037627	5.1631	3.75523e-05	down
RNA48200|UCSC_7040_1525	uc010kfo.1	5.12996	0.0194511	down
RNA52128|UCSC_11757_206	uc001nne.1	5.10338	0.0112955	down
RNA48841|UCSC_7820_1323	uc010kfp.1	5.026	0.0495333	down
RNA164968|XLOC_006294	XLOC_006294	4.99927	0.045884	down
RNA46246|UCSC_4659_2071	uc010fjq.2	4.97184	0.0070533	down
RNA51291|UCSC_10783_581	uc002nzx.3	4.93629	0.0485633	down
RNA51643|UCSC_11221_440	uc002nzy.3	4.93492	0.0483144	down
RNA53440|H-InvDB_709_540	HIT000251484.11	4.85536	0.0431822	down
RNA157908|XLOC_000782	XLOC_000782	4.8254	0.0242782	down
RNA40633|RefSeq_2706_1083	NR_034180	4.76152	0.0299793	down
RNA54856|H-InvDB_2204_284	HIT000073726.11	4.50741	0.000722941	down
RNA46746|UCSC_5273_1930	uc003ncv.1	4.47905	0.0485791	down
RNA37675|ENCODE_2547_372	ENST00000457670	4.44561	0.0440708	down
RNA40544|RefSeq_2607_1174	NR_027783	4.28456	0.024765	down
RNA41122|RefSeq_3239_578	NR_026578	4.24969	0.034619	down
RNA47149|UCSC_5750_1818	uc001mmh.1	4.14499	0.0233268	down
RNA164213|XLOC_005634	XLOC_005634	4.10232	0.0382988	down
RNA40189|RefSeq_2221_1562	NR_034091	4.007	0.0145102	down
RNA54355|H-InvDB_1665_339	HIT000091244.10	3.98312	0.00118824	down
RNA47010|UCSC_5582_1855	uc001kct.2	3.97934	0.0310593	down
RNA41218|RefSeq_3347_439	NR_033203	3.97294	0.0284684	down
RNA36444|ENCODE_1314_603	ENST00000449466	3.9163	0.046568	down
RNA41123|RefSeq_3240_578	NR_026578	3.85521	0.039234	down
RNA41198|RefSeq_3323_476	NR_033202	3.84199	0.0282286	down
RNA40216|RefSeq_2253_1527	NR_037651	3.83311	0.00623309	down
RNA34671|NRED_803_1655	AL050204	3.819	0.00263988	down
RNA52914|H-InvDB_172_833	HIT000429980.4	3.80728	0.012812	down
RNA175088|ENST00000503066	ENST00000503066	3.80275	0.00921106	down
RNA41158|RefSeq_3277_532	NR_033205	3.75681	0.025206	down
RNA37796|ENCODE_2668_339	ENST00000420081	3.72171	0.0103429	down
RNA160511|XLOC_011950	XLOC_011950	3.71532	0.0405836	down
RNA53841|H-InvDB_1122_412	HIT000196381.9	3.68828	0.010514	down
RNA40320|RefSeq_2364_1422	NR_027020	3.67875	0.0334387	down
RNA48599|UCSC_7516_1404	uc002ubd.2	3.657	0.0441753	down
RNA36370|ENCODE_1240_626	ENST00000416638	3.63244	0.0425276	down
RNA46393|UCSC_4838_2027	uc003ybu.1	3.55529	0.0250346	down
RNA51814|UCSC_11407_372	uc003njc.1	3.54198	0.0196517	down
RNA48916|UCSC_7906_1300	uc010yww.1	3.53918	0.00477742	down
RNA42818|UCSC_431_5379	uc003gve.2	3.51245	0.000548136	down
RNA58695|asoverlaps_245_2314	ASO1824	3.4379	0.0160427	down
RNA36459|ENCODE_1329_599	ENST00000433734	3.40119	0.0242784	down
RNA48156|UCSC_6987_1540	uc010kfn.1	3.38346	0.0275691	down
RNA47457|UCSC_6122_1735	uc003olt.2	3.38174	0.0423228	down
RNA48190|UCSC_7028_1529	uc002pvm.2	3.38154	0.0481586	down
RNA164654|XLOC_006349	XLOC_006349	3.36005	0.0199282	down
RNA163478|XLOC_003775	XLOC_003775	3.33602	0.000675431	down
RNA96371|EvoFold_191_265	EvoFold_2784	3.3338	0.0495015	down
RNA45459|UCSC_3668_2355	uc002bsl.3	3.23814	0.0498643	down
RNA44130|UCSC_2010_3175	uc010ugb.1	3.23138	0.012687	down
RNA61765|RNAz_2479_253	RNZ20496	3.2125	0.0134776	down
RNA39868|RefSeq_1881_1847	NR_033308	3.19517	0.0271509	down
RNA53563|H-InvDB_833_493	HIT000058648.12	3.16781	0.0168776	down
RNA44008|UCSC_1863_3285	uc011laa.1	3.1673	0.0155881	down
RNA63999|RNAz_4719_214	RNZ1365	3.12872	0.0352205	down
RNA176803|ENST00000500410	ENST00000500410	3.10858	0.0423581	down
RNA39020|RefSeq_972_2842	NR_024047	3.09592	0.0176104	down
RNA49318|UCSC_8381_1186	uc002mdn.2	3.08375	0.0382619	down
RNA39781|RefSeq_1785_1950	NR_028334	3.063	0.0333898	down
RNA62175|RNAz_2893_240	RNZ28522	3.04098	0.0430077	down
RNA35796|ENCODE_665_881	ENST00000432268	3.02687	0.0426897	down
RNA51210|UCSC_10682_609	uc010gcn.1	3.02344	0.0430757	down
RNA50771|UCSC_10151_757	uc003qvh.2	3.01142	0.00666225	down
RNA47563|UCSC_6272_1700	uc010dgc.1	3.00105	0.0300958	down
RNA46896|UCSC_5445_1887	uc010chp.2	2.99685	0.0272132	down
RNA162112|XLOC_013499	XLOC_013499	2.97762	0.0189484	down
RNA46773|UCSC_5300_1922	uc002vxa.1	2.9745	0.0153865	down
RNA46250|UCSC_4664_2070	uc002trf.1	2.96771	0.039745	down
RNA159683|XLOC_010579	XLOC_010579	2.94768	0.0368966	down
RNA53360|H-InvDB_627_567	HIT000293862.11	2.94687	0.0374688	down
RNA45362|UCSC_3551_2391	uc011cge.1	2.91422	0.00895893	down
RNA53750|H-InvDB_1028_431	HIT000434861_02.2	2.88523	0.0241756	down
RNA37997|ENCODE_2870_254	ENST00000445531	2.85453	0.00497457	down
RNA61340|RNAz_2054_269	RNZ20502	2.82325	0.0102738	down
RNA44575|UCSC_2557_2831	uc002bmw.1	2.78878	0.0243285	down
RNA45510|UCSC_3734_2338	uc002bmu.1	2.764	0.0241673	down
RNA53714|H-InvDB_991_438	HIT000434857_02.2	2.72843	0.028951	down
RNA42898|UCSC_534_5050	uc001dac.2	2.68584	0.0385682	down
RNA45343|UCSC_3528_2399	uc003ktj.2	2.67825	0.0405729	down
RNA63820|RNAz_4540_218	RNZ18800	2.67094	0.0300154	down
RNA44788|UCSC_2827_2695	uc010upn.1	2.63517	0.0265192	down
RNA161830|XLOC_001748	XLOC_001748	2.63144	0.035481	down
RNA43448|UCSC_1186_3838	uc002yiy.3	2.63045	0.00738422	down
RNA46249|UCSC_4663_2070	uc010zan.1	2.62684	0.0406336	down
RNA50784|UCSC_10166_754	uc003jnt.2	2.62545	0.0390878	down
RNA54245|H-InvDB_1548_350	HIT000384069.4	2.62135	0.029268	down
RNA176971|ENST00000432536	ENST00000432536	2.61008	0.0394347	down
RNA54593|H-InvDB_1920_315	HIT000191813.10	2.60341	0.0145653	down
RNA43228|UCSC_928_4202	uc003swp.3	2.58732	0.0272456	down
RNA57937|UCRs_252_239	uc.428+	2.54787	0.0259471	down
RNA49290|UCSC_8342_1194	uc011cfh.1	2.5263	0.0444959	down
RNA49984|UCSC_9168_1011	uc010vya.1	2.51276	0.0218978	down
RNA59612|RNAz_323_381	RNZ29018	2.50793	0.0331074	down
RNA42496|UCSC_40_9344	uc002vek.2	2.50654	0.0463313	down
RNA54298|H-InvDB_1604_343	HIT000076909.11	2.48554	0.00576494	down
RNA59228|asoverlaps_940_520	ASO2219	2.48184	0.00341748	down
RNA57811|UCRs_126_278	uc.181+	2.47715	0.0400772	down
RNA58112|UCRs_427_206	uc.106+	2.45446	0.0141676	down
RNA44803|UCSC_2846_2686	uc010ikv.2	2.43871	0.0207647	down
RNA44848|UCSC_2902_2659	uc002uff.2	2.40505	0.017846	down
RNA59449|RNAz_160_428	RNZ36523	2.38386	0.000394991	down
RNA44689|UCSC_2706_2757	uc003jnb.1	2.3808	0.00078718	down
RNA159321|XLOC_010061	XLOC_010061	2.36433	0.0300776	down
RNA47644|UCSC_6366_1679	uc002jnc.2	2.3634	0.0275822	down
RNA178540|ENST00000517790	ENST00000517790	2.36235	0.01691	down
RNA44261|UCSC_2176_3065	uc010ktt.2	2.35496	0.0488367	down
RNA61650|RNAz_2364_258	RNZ16264	2.34088	0.0118673	down
RNA163742|XLOC_004803	XLOC_004803	2.33434	0.00155787	down
RNA160381|XLOC_011602	XLOC_011602	2.33164	0.0416776	down
RNA54671|H-InvDB_2003_307	HIT000254630.10	2.31677	0.00734313	down
RNA176273|ENST00000518993	ENST00000518993	2.31213	0.048823	down
RNA58969|asoverlaps_601_1464	ASO2175	2.31029	0.0080081	down
RNA47736|UCSC_6473_1652	uc011kuj.1	2.30299	0.0456478	down
RNA33980|NRED_110_3770	AL049332	2.30155	0.0236697	down
RNA62794|RNAz_3512_236	RNZ33855	2.29678	0.0237578	down
RNA40155|RefSeq_2184_1597	NR_024043	2.2967	0.0288036	down
RNA47292|UCSC_5918_1780	uc001jad.2	2.27216	0.0425676	down
RNA62185|RNAz_2903_240	RNZ36522	2.2685	0.00390658	down
RNA41141|RefSeq_3259_562	NR_027646	2.25909	0.0241212	down
RNA58045|UCRs_360_216	uc.104+	2.25659	0.0459062	down
RNA42646|UCSC_219_6530	uc010uga.1	2.23383	0.0407213	down
RNA38978|RefSeq_928_2898	NR_034039	2.22388	0.00673471	down
RNA44404|UCSC_2354_2941	uc002evp.1	2.21861	0.00586284	down
RNA37277|ENCODE_2148_442	ENST00000451792	2.20672	0.00298026	down
RNA36655|ENCODE_1525_557	ENST00000444259	2.19785	0.0368446	down
RNA178283|ENST00000545818	ENST00000545818	2.1904	0.0247826	down
RNA39808|RefSeq_1814_1912	NR_027114	2.18788	0.00680611	down
RNA62394|RNAz_3112_239	RNZ23992	2.17279	0.00433676	down
RNA60118|RNAz_830_317	RNZ19970	2.17081	0.0422807	down
RNA177074|ENST00000534914	ENST00000534914	2.16392	0.0126053	down
RNA60470|RNAz_1182_299	RNZ26798	2.15973	0.0458637	down
RNA177236|ENST00000413185	ENST00000413185	2.15658	0.0190483	down
RNA58103|UCRs_418_207	uc.263+	2.15377	0.0279515	down
RNA51827|UCSC_11422_364	uc011fyv.1	2.14891	0.0266255	down
RNA42884|UCSC_518_5094	uc002nib.1	2.14779	0.00793261	down
RNA51829|UCSC_11424_364	uc011faj.1	2.14707	0.0221335	down
RNA42926|UCSC_572_4933	uc011lts.1	2.14517	0.0268052	down
RNA54020|H-InvDB_1302_386	HIT000066907.9	2.12063	0.0498425	down
RNA53561|H-InvDB_831_495	HIT000222023.12	2.11462	0.00627473	down
RNA60040|RNAz_752_320	RNZ18280	2.10809	0.0456541	down
RNA51828|UCSC_11423_364	uc003nrx.1	2.10073	0.0216038	down
RNA51624|UCSC_11201_446	uc011fak.1	2.09746	0.0245997	down
RNA40282|RefSeq_2325_1462	NR_026910	2.08476	0.00640411	down
RNA42924|UCSC_570_4937	uc011ltt.1	2.08392	0.0289118	down
RNA42939|UCSC_587_4896	uc011ltr.1	2.07982	0.0347066	down
RNA163959|XLOC_004979	XLOC_004979	2.07668	0.0312433	down
RNA42740|UCSC_335_5757	uc003xej.2	2.07225	0.0494876	down
RNA45586|UCSC_3837_2305	uc002gnc.1	2.06888	0.0113461	down
RNA163274|XLOC_003595	XLOC_003595	2.06357	0.0350895	down
RNA51622|UCSC_11199_446	uc011fyw.1	2.05853	0.00163094	down
RNA47954|UCSC_6735_1596	uc003ngo.2	2.05408	0.0384132	down
RNA47717|UCSC_6450_1660	uc003ngn.2	2.05339	0.0325126	down
RNA34403|NRED_535_2090	BC057846	2.05095	0.0421697	down
RNA176274|ENST00000517898	ENST00000517898	2.04798	0.0448064	down
RNA51623|UCSC_11200_446	uc003nry.1	2.04475	0.0173571	down
RNA47332|UCSC_5965_1771	uc002xbr.2	2.04264	0.0161228	down
RNA39593|RefSeq_1584_2129	NR_026728	2.03597	0.0236093	down
RNA46351|UCSC_4786_2041	uc009zam.2	2.02168	0.00312331	down
RNA47390|UCSC_6035_1754	uc009xqb.2	2.02113	0.0463568	down
RNA49818|UCSC_8977_1052	uc002cfh.2	2.01631	0.0338441	down
RNA58228|CombinedLit_131_1235	LIT3609	2.0137	0.000737139	down
RNA175835|ENST00000427306	ENST00000427306	2.01218	0.00362598	down
RNA41235|RefSeq_3367_369	NR_027179	2.01212	0.0296724	down
RNA46010|UCSC_4362_2142	uc009zan.2	2.00721	0.00976388	down
RNA48052|UCSC_6852_1570	uc009web.2	2.00197	0.00723902	down
